# Supplementary material for: Detection of carboxylesterase by a novel hydrosoluble near-infrared fluorescence probe
Source: Royal Society of Chemistry journal article supplement (doi:10.1039/c9ra08150j), 2019-01-01
Supplement: c9ra08150j1.pdf [file c9ra08150j1.pdf]

## Electronic Supplementary Information for:

### Detection of Carboxylesterase by A New Near-Infrared Fluorescence off-on Probe

Mengyao Li,<sup>a, c</sup> Chen Zhai,<sup>\*a</sup> Shuya Wang,<sup>a</sup> Weixia Huang,<sup>a</sup> Yunguo Liu<sup>c</sup> and Zhao Li<sup>\*b</sup>

<sup>a</sup> *Nutrition & Health Research Institute, COFCO Corporation, Beijing Key Laboratory of Nutrition & Health and Food Safety, Beijing 102209, China*

<sup>b</sup> *Shaanxi Engineering Laboratory for Food Green Processing and Safety Control, College of Food Engineering and Nutritional Science, Shaanxi Normal University, Xi'an 710062, China*

<sup>c</sup> *School of life science and technology, Xinjiang university, Urumqi 830002, China*

\*Corresponding author: zhaichen@cofco.com (C Zhai)

### Table of contents

1. Synthesis of probe 1
2. Electrospray ionization mass spectrum of the reaction solution of probe 1
3. Effects of pH
4. kinetic curves of probe 1 reacting with carboxylesterase
5. Cytotoxicity assay
6. Relative pixel intensity measurements in HeLa cells

## 1. Synthesis of probe 1

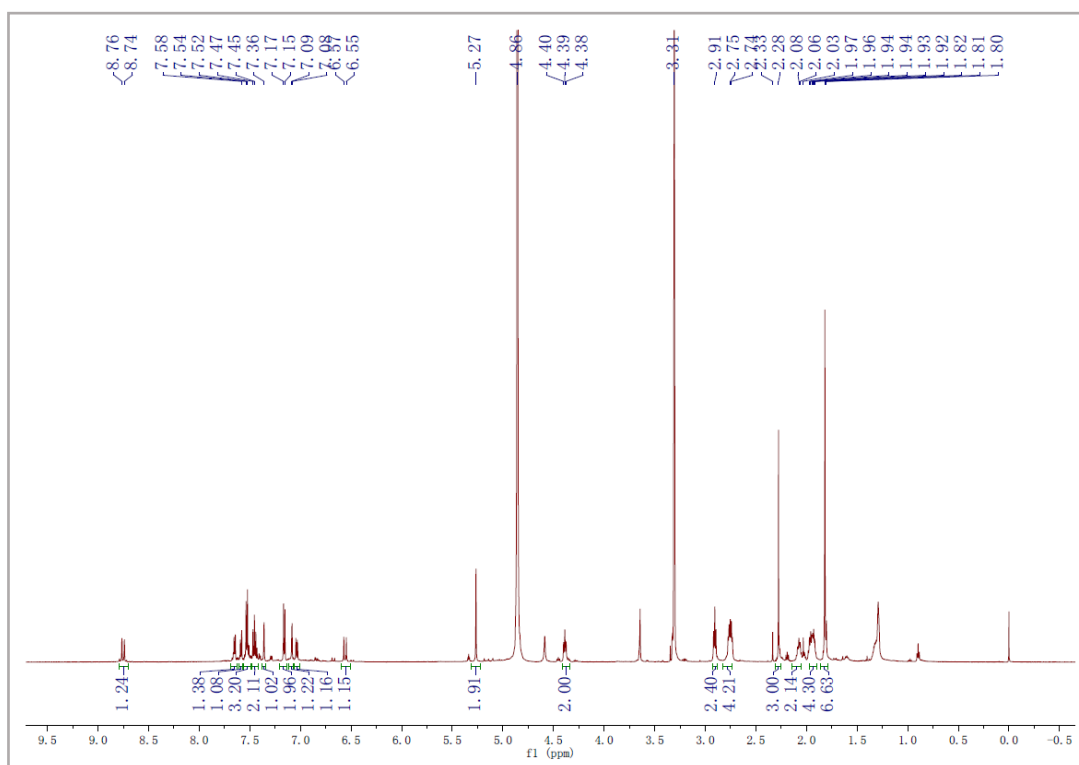

Fig. S1 <sup>1</sup>H NMR spectrum of probe 1 in CD<sub>3</sub>OD.

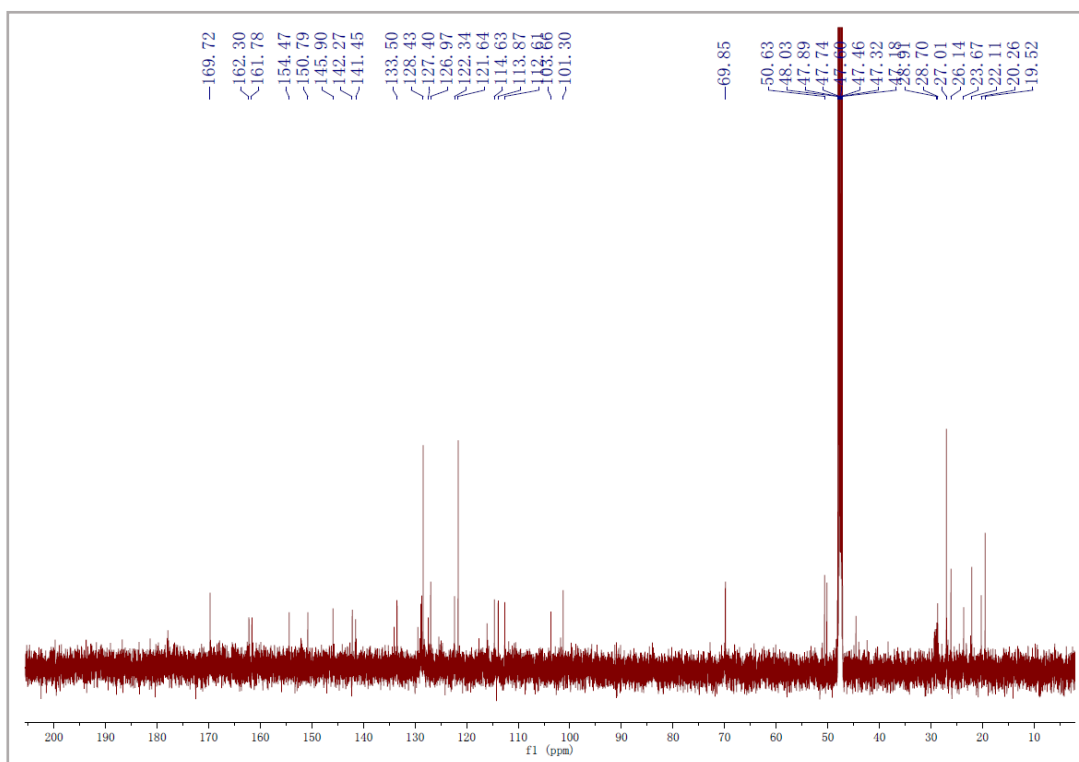

Fig. S2 <sup>13</sup>C NMR spectrum of probe 1 in CD<sub>3</sub>OD.

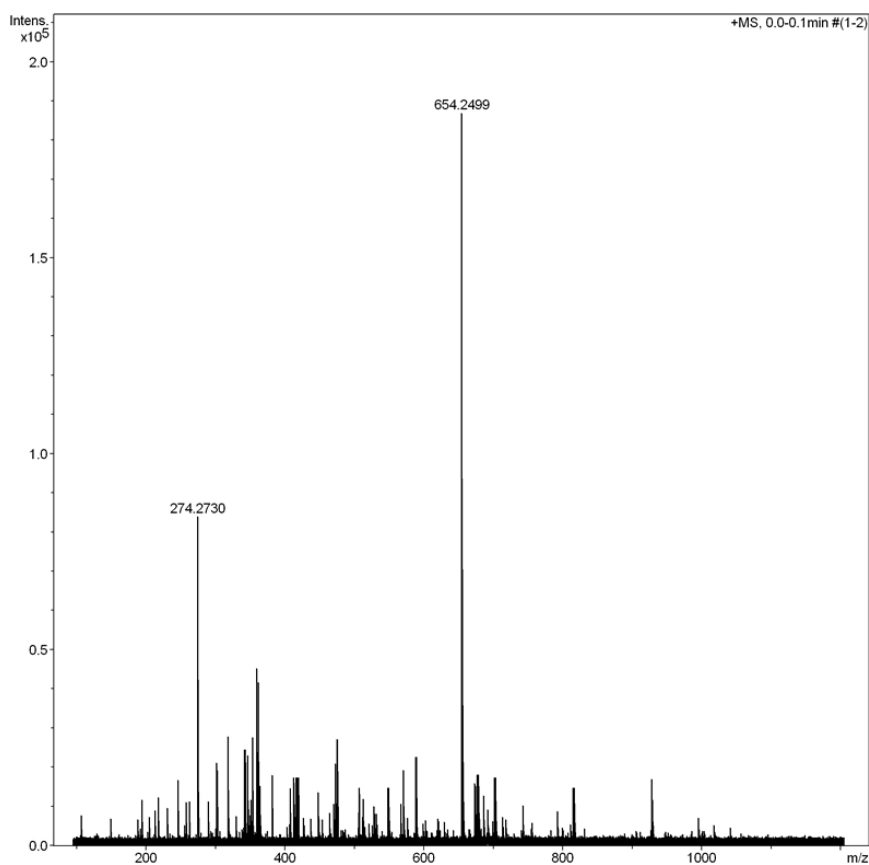

**Fig. S3** ESI-MS of the probe 1

## 2. Electrospray ionization mass spectrum of the reaction solution of probe 1

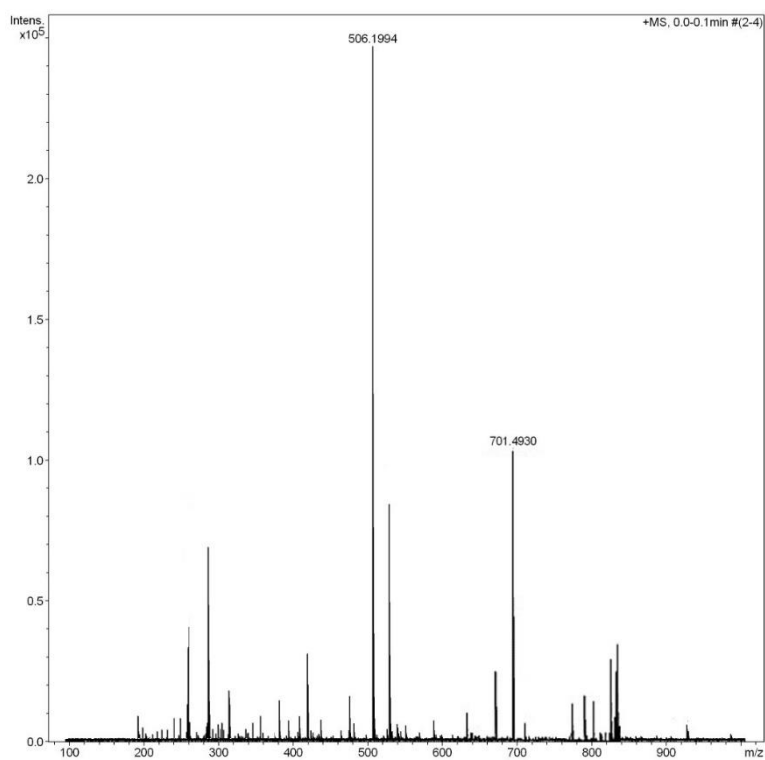

**Fig. S4** ESI-MS of the reaction solution of probe 1 (20  $\mu$ M) with carboxylesterase (1 U/mL).

### 3. Effects of pH

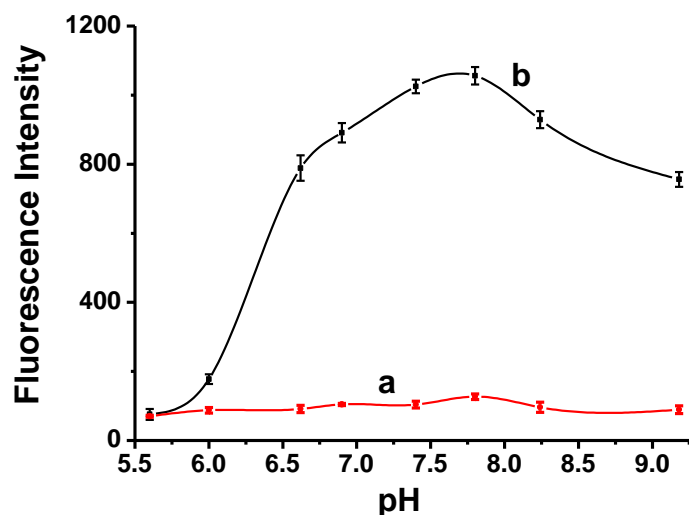

**Fig. S5** Effects of pH on the fluorescence of 10  $\mu$ M probe **1** (a) before and (b) after reaction with carboxylesterase (1 U/mL). The results are the mean  $\pm$  standard deviation of three separate measurements;  $\lambda_{ex/em}$ =670/706 nm.

### 4. Fluorescence kinetic curves of probe 1 reacting with carboxylesterase

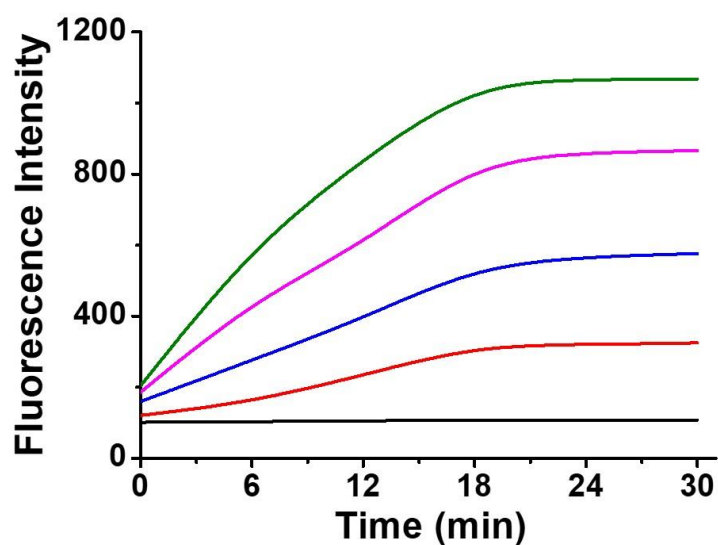

**Fig. S6** Plots of fluorescence intensity of probe **1** (10  $\mu$ M) vs. the reaction time in the presence of varied concentrations of carboxylesterase (from bottom to top): 0 (control), 0.025, 0.1, 0.4 and 1 U/mL. The measurements were performed at 37  $^{\circ}$ C in 10 mM PBS (pH 7.4) with  $\lambda_{ex/em}$ = 670/706 nm.

## 5. Cytotoxicity assay

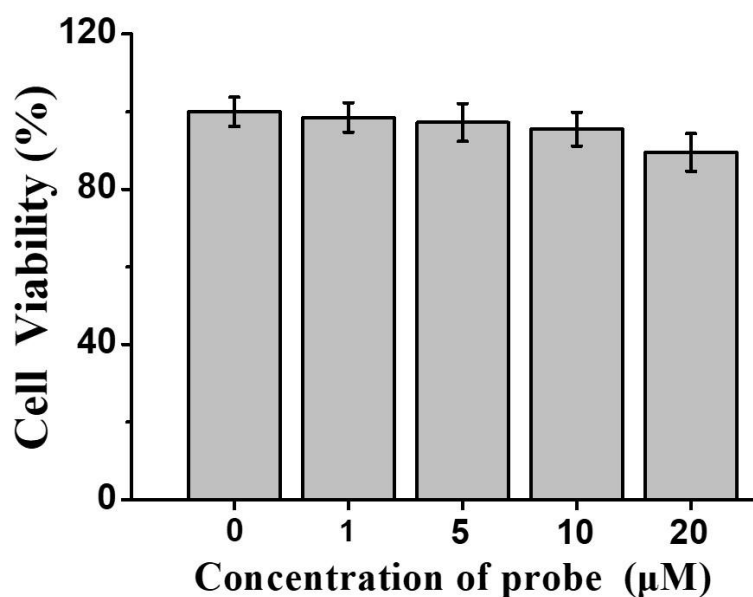

**Fig. S7** Effects of probe **1** with varied concentrations (10  $\mu\text{M}$ ) on the viability of HeLa cells. The viability of the cells without probe **1** is defined as 100%. The results are the mean  $\pm$  standard deviation of six separate measurements.

## 6. Relative pixel intensity measurements in HeLa cells

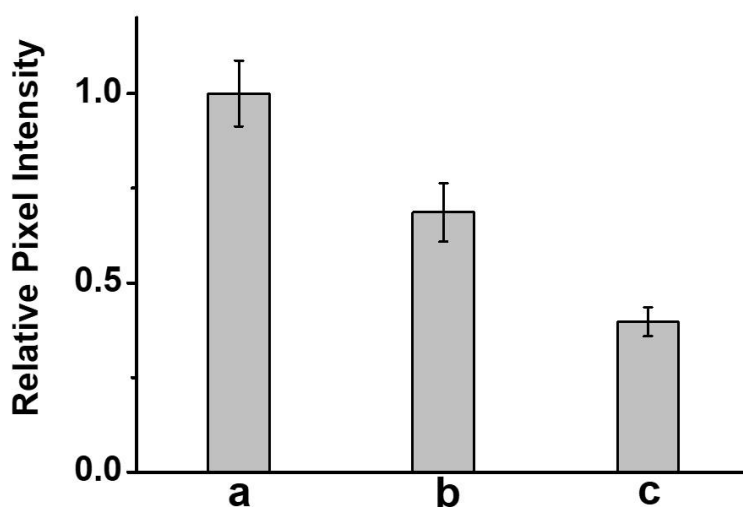

**Fig. S8** Relative pixel intensity measurements obtained from the images of HeLa cells: (a) the cells were incubated with 10  $\mu\text{M}$  probe **1** for 20 min; (b) the cells were pretreated with 0.5 mM AEBSF for 30 min and then incubated with 10  $\mu\text{M}$  probe **1** for 20 min; (c) the cells were pretreated with 1.0 mM AEBSF for 30 min and then incubated with 10  $\mu\text{M}$  probe **1** for 20 min. The strongest fluorescence intensity from the image of cells incubated with probe **1** (10  $\mu\text{M}$ ) for 20 min is defined as 1.0. The results are the mean  $\pm$  standard deviation of three separate measurements.
